# Supplementary material for: Nonplantigrade Foot Posture: A Constraint on Dinosaur Body Size
Source: PLoS One. 2016 Jan 20;11(1):e0145716. doi: 10.1371/journal.pone.0145716 (PMC4720450; doi:10.1371/journal.pone.0145716)
Supplement: S3 Table — (XLSX) [file pone.0145716.s004.xlsx]

## Sheet: S3
S3 Table. Log10 body size (g) of birds and mammals.
Non- Volant terrestrial birds	Nearctic extinct non-plantigrade mammals	Non-plantigrade mammals	Non-plnatigrade mammals without Macroscelidae	Plantigrade mammals
2.98107	2.91759	1.51175	2.70879	0.354108
3.07918	2.95147	1.58704	2.97994	0.390935
3.09035	2.99229	1.63417	2.98531	0.392697
3.11307	3.07611	1.65427	2.99498	0.394452
3.24304	3.13778	1.68931	3.11963	0.39794
3.33254	3.14299	1.69627	3.13442	0.409933
3.36064	3.16731	1.72247	3.15191	0.431364
3.38076	3.176	1.75587	3.27645	0.49693
3.39146	3.27675	1.77459	3.28398	0.503791
3.43537	3.31931	1.81664	3.31973	0.517196
4.36173	3.33147	2.3032	3.36345	0.525045
4.3784	3.34971	2.62736	3.39794	0.52763
4.53403	3.35102	2.62831	3.40043	0.531479
4.54407	3.37838	2.70879	3.41753	0.542825
4.64345	3.39575	2.72852	3.42325	0.542825
4.67486	3.43397	2.97994	3.42325	0.547775
5.04532	3.46567	2.98531	3.42325	0.579784
	3.46654	2.99498	3.4442	0.605305
	3.49086	3.11963	3.44716	0.609594
	3.54905	3.13442	3.45077	0.623249
	3.64286	3.15191	3.45128	0.633468
	3.67457	3.27645	3.46012	0.635484
	3.68325	3.28398	3.4624	0.643453
	3.70062	3.31973	3.46535	0.643453
	3.71061	3.36345	3.47238	0.667453
	3.71322	3.39794	3.47375	0.680336
	3.7219	3.40043	3.47857	0.696356
	3.75795	3.41753	3.4843	0.698101
	3.78531	3.42325	3.49568	0.698101
	3.79226	3.42325	3.51188	0.698101
	3.80355	3.42325	3.51466	0.698101
	3.83699	3.4442	3.53459	0.698101
	3.84437	3.44716	3.53523	0.698101
	3.85045	3.45077	3.54407	0.698101
	3.87391	3.45128	3.54824	0.700704
	3.88303	3.46012	3.55441	0.711807
	3.88563	3.4624	3.58362	0.711807
	3.9182	3.46535	3.59259	0.722634
	3.91994	3.47238	3.61258	0.725095
	3.92559	3.47375	3.6248	0.730782
	3.93601	3.47857	3.6267	0.737987
	3.94122	3.4843	3.62675	0.739572
	3.99464	3.49568	3.65321	0.746634
	4.00637	3.51188	3.65731	0.748188
	4.02113	3.51466	3.66021	0.750508
	4.03242	3.53459	3.66499	0.777427
	4.03286	3.53523	3.68308	0.777427
	4.05674	3.54407	3.68425	0.777427
	4.05718	3.54824	3.68985	0.778874
	4.06022	3.55441	3.69897	0.788875
	4.065	3.58362	3.72211	0.797268
	4.065	3.59259	3.73933	0.797268
	4.06977	3.61258	3.7438	0.799341
	4.08715	3.6248	3.7512	0.804139
	4.09019	3.6267	3.75904	0.805501
	4.0954	3.62675	3.80103	0.808211
	4.11364	3.65321	3.80444	0.812913
	4.12667	3.65731	3.83727	0.812913
	4.13926	3.66021	3.85479	0.812913
	4.1397	3.66499	3.88798	0.818885
	4.15316	3.68308	3.90168	0.822822
	4.15924	3.68425	3.91029	0.825426
	4.1701	3.68985	3.91059	0.825426
	4.17053	3.69897	3.91236	0.828015
	4.17053	3.72211	3.91631	0.840106
	4.17661	3.73933	3.92237	0.841359
	4.17661	3.7438	3.93236	0.841985
	4.19702	3.7512	3.93532	0.844477
	4.20093	3.75904	3.94579	0.845098
	4.21135	3.80103	3.95424	0.845098
	4.21266	3.80444	3.96614	0.845098
	4.22395	3.83727	3.97298	0.845098
	4.22829	3.85479	3.98227	0.845098
	4.2309	3.88798	3.9842	0.845098
	4.23871	3.90168	3.98492	0.845098
	4.26086	3.91029	3.986	0.845098
	4.26911	3.91059	4.01672	0.845098
	4.2791	3.91236	4.02132	0.845098
	4.28258	3.91631	4.03192	0.845098
	4.29778	3.92237	4.03543	0.866287
	4.30864	3.93236	4.03815	0.870989
	4.31081	3.93532	4.04336	0.875061
	4.31341	3.94579	4.0522	0.875061
	4.31906	3.95424	4.06676	0.880242
	4.32774	3.96614	4.07482	0.883661
	4.3525	3.97298	4.07789	0.886491
	4.36119	3.98227	4.07879	0.893762
	4.36596	3.9842	4.07918	0.901458
	4.36596	3.98492	4.08331	0.90309
	4.38116	3.986	4.09612	0.90309
	4.38768	4.01672	4.09691	0.90309
	4.39289	4.02132	4.10464	0.904716
	4.39549	4.03192	4.10585	0.905256
	4.39897	4.03543	4.12086	0.906874
	4.40418	4.03815	4.12436	0.907411
	4.40896	4.04336	4.1299	0.908485
	4.41069	4.0522	4.13033	0.912222
	4.42633	4.06676	4.13665	0.913284
	4.42633	4.07482	4.13665	0.9154
	4.4437	4.07789	4.15721	0.915927
	4.44457	4.07879	4.16662	0.916454
	4.46194	4.07918	4.1745	0.919078
	4.46672	4.08331	4.19412	0.920123
	4.46759	4.09612	4.19421	0.920645
	4.47844	4.09691	4.19465	0.932474
	4.488	4.10464	4.19866	0.933487
	4.49538	4.10585	4.20412	0.935003
	4.49625	4.12086	4.20606	0.948413
	4.49973	4.12436	4.21748	0.950365
	4.52101	4.1299	4.21748	0.95376
	4.52318	4.13033	4.22098	0.95376
	4.52491	4.13665	4.23518	0.95376
	4.53317	4.13665	4.2458	0.959041
	4.53881	4.15721	4.2645	0.962843
	4.5501	4.16662	4.26928	0.96426
	4.55227	4.1745	4.26928	0.968483
	4.55531	4.19412	4.27684	0.969416
	4.56053	4.19421	4.27736	0.970347
	4.56574	4.19465	4.28056	0.970347
	4.56748	4.19866	4.2809	0.974051
	4.58441	4.20412	4.28515	0.980458
	4.59223	4.20606	4.28556	0.984977
	4.59353	4.21748	4.30103	0.990783
	4.59397	4.21748	4.30103	0.995196
	4.5957	4.22098	4.31275	1
	4.61177	4.23518	4.32427	1
	4.61916	4.2458	4.32498	1
	4.6235	4.2645	4.32852	1
	4.6235	4.26928	4.34242	1.00689
	4.63088	4.26928	4.34242	1.0086
	4.63349	4.27684	4.34655	1.0086
	4.64652	4.27736	4.35222	1.0086
	4.64869	4.28056	4.35662	1.01072
	4.65043	4.2809	4.35998	1.01199
	4.67301	4.28515	4.36338	1.01494
	4.67996	4.28556	4.36544	1.02119
	4.69689	4.30103	4.36782	1.02119
	4.69863	4.30103	4.38246	1.02325
	4.70297	4.31275	4.39174	1.02366
	4.70602	4.32427	4.43106	1.02938
	4.7121	4.32498	4.43136	1.03019
	4.72035	4.32852	4.43136	1.03019
	4.72165	4.34242	4.43933	1.03663
	4.72165	4.34242	4.44793	1.03743
	4.72208	4.34655	4.45139	1.03941
	4.72382	4.35222	4.45934	1.03941
	4.72382	4.35662	4.46035	1.04139
	4.72643	4.35998	4.46613	1.04139
	4.7312	4.36338	4.46765	1.04689
	4.7312	4.36544	4.47712	1.04844
	4.73598	4.36782	4.47712	1.05269
	4.73989	4.38246	4.50183	1.05269
	4.7464	4.39174	4.50241	1.05308
	4.75205	4.43106	4.51188	1.05423
	4.75596	4.43136	4.51499	1.0607
	4.76117	4.43136	4.52201	1.06258
	4.76638	4.43933	4.52597	1.06408
	4.76725	4.44793	4.53933	1.06744
	4.76855	4.45139	4.54494	1.06856
	4.77681	4.45934	4.55104	1.07004
	4.78679	4.46035	4.55992	1.07004
	4.7881	4.46613	4.56456	1.07078
	4.79027	4.46765	4.57343	1.07298
	4.79287	4.47712	4.57673	1.07591
	4.79548	4.47712	4.58888	1.07809
	4.80417	4.50183	4.59215	1.07918
	4.81155	4.50241	4.60002	1.07918
	4.81806	4.51188	4.60206	1.07918
	4.81806	4.51499	4.6167	1.07918
	4.82458	4.52201	4.61892	1.07918
	4.82762	4.52597	4.63325	1.08565
	4.82849	4.53933	4.63378	1.086
	4.83109	4.54494	4.63599	1.08743
	4.83543	4.55104	4.63638	1.08884
	4.83761	4.55992	4.66722	1.08991
	4.84846	4.56456	4.67565	1.08991
	4.85715	4.57343	4.67624	1.09342
	4.86366	4.57673	4.67669	1.09587
	4.86714	4.58888	4.6791	1.09691
	4.8819	4.59215	4.69423	1.09691
	4.88538	4.60002	4.70396	1.09864
	4.89102	4.60206	4.71879	1.10106
	4.89146	4.6167	4.71933	1.1014
	4.8958	4.61892	4.72092	1.11059
	4.8971	4.63325	4.72428	1.11361
	4.89971	4.63378	4.73089	1.11361
	4.89971	4.63599	4.73202	1.11361
	4.90318	4.63638	4.73483	1.11628
	4.90362	4.66722	4.74036	1.12024
	4.90449	4.67565	4.74401	1.12057
	4.90796	4.67624	4.74954	1.12581
	4.91621	4.67669	4.75478	1.12646
	4.91665	4.6791	4.75758	1.13001
	4.9236	4.69423	4.76387	1.13001
	4.92447	4.70396	4.76455	1.13925
	4.92447	4.71879	4.78461	1.13988
	4.92577	4.71933	4.79244	1.14082
	4.93055	4.72092	4.80188	1.14114
	4.93272	4.72428	4.82201	1.14301
	4.93706	4.73089	4.83562	1.14613
	4.94097	4.73202	4.83632	1.14613
	4.9566	4.73483	4.83643	1.14613
	4.96442	4.74036	4.83925	1.14613
	4.96572	4.74401	4.84036	1.14953
	4.96746	4.74954	4.84198	1.15412
	4.97007	4.75478	4.84228	1.15442
	4.9705	4.75758	4.8451	1.15806
	4.97658	4.76387	4.8463	1.15957
	4.97788	4.76455	4.85385	1.16107
	4.98831	4.78461	4.85408	1.16107
	4.99178	4.79244	4.85797	1.16107
	4.99526	4.80188	4.87032	1.16107
	4.99612	4.82201	4.873	1.16107
	4.99699	4.83562	4.87826	1.16107
	5.00264	4.83632	4.87856	1.16107
	5.01914	4.83643	4.8796	1.16376
	5.02609	4.83925	4.88025	1.17319
	5.02696	4.84036	4.89089	1.17435
	5.03955	4.84198	4.89389	1.17609
	5.04346	4.84228	4.89835	1.17609
	5.06605	4.8451	4.90328	1.17609
	5.0769	4.8463	4.91645	1.17609
	5.07907	4.85385	4.92398	1.17811
	5.08298	4.85408	4.92671	1.18355
	5.08646	4.85797	4.92717	1.18583
	5.08689	4.87032	4.93352	1.18921
	5.09297	4.873	4.94259	1.19033
	5.09601	4.87826	4.94765	1.19117
	5.10904	4.87856	4.95137	1.19229
	5.11555	4.8796	4.95424	1.19618
	5.1225	4.88025	4.96825	1.19756
	5.13162	4.89089	4.97406	1.19866
	5.13423	4.89389	4.97461	1.20058
	5.1351	4.89835	4.97987	1.20303
	5.1364	4.90328	4.98262	1.20358
	5.13814	4.91645	4.99053	1.20412
	5.13988	4.92398	5.00063	1.20412
	5.13988	4.92671	5.03192	1.20412
	5.14769	4.92717	5.03778	1.20412
	5.15898	4.93352	5.0451	1.20412
	5.16072	4.94259	5.05122	1.21272
	5.1642	4.94765	5.0569	1.21325
	5.18374	4.95137	5.10447	1.2159
	5.18678	4.95424	5.11394	1.21722
	5.1985	4.96825	5.13292	1.21722
	5.21848	4.97406	5.13354	1.21748
	5.225	4.97461	5.17609	1.21985
	5.22804	4.97987	5.19465	1.22194
	5.22977	4.98262	5.19569	1.22505
	5.23064	4.99053	5.20037	1.22531
	5.23151	5.00063	5.20666	1.23045
	5.23803	5.03192	5.20866	1.23045
	5.23976	5.03778	5.20929	1.23096
	5.24454	5.0451	5.21748	1.23172
	5.24801	5.05122	5.22008	1.2335
	5.25323	5.0569	5.2271	1.23553
	5.25453	5.10447	5.22916	1.2398
	5.258	5.11394	5.23356	1.24055
	5.26365	5.13292	5.2458	1.24055
	5.27147	5.13354	5.24925	1.24304
	5.28319	5.17609	5.2594	1.24304
	5.29231	5.19465	5.26067	1.24551
	5.29579	5.19569	5.27509	1.24895
	5.31446	5.20037	5.28056	1.25527
	5.31576	5.20666	5.28056	1.25527
	5.32054	5.20866	5.29695	1.25696
	5.32619	5.20929	5.29802	1.26007
	5.34095	5.21748	5.30059	1.26007
	5.35398	5.22008	5.30228	1.26007
	5.35702	5.2271	5.31047	1.2615
	5.35702	5.22916	5.31399	1.26245
	5.36875	5.23356	5.33244	1.26553
	5.37222	5.2458	5.36173	1.26717
	5.39785	5.24925	5.37107	1.26717
	5.40523	5.2594	5.37153	1.26788
	5.41044	5.26067	5.37366	1.26858
	5.41348	5.27509	5.38178	1.26975
	5.41696	5.28056	5.4055	1.27184
	5.42694	5.28056	5.40991	1.27277
	5.44388	5.29695	5.42189	1.2737
	5.44562	5.29802	5.43297	1.27852
	5.44649	5.30059	5.44585	1.27875
	5.45126	5.30228	5.44892	1.27875
	5.46603	5.31047	5.45096	1.27875
	5.47689	5.31399	5.46802	1.27875
	5.49513	5.33244	5.46911	1.27875
	5.50164	5.36173	5.49305	1.28307
	5.52466	5.37107	5.49485	1.28556
	5.52553	5.37153	5.60206	1.28556
	5.52553	5.37366	5.60595	1.29003
	5.5277	5.38178	5.61066	1.29003
	5.53812	5.4055	5.66455	1.29203
	5.55897	5.40991	5.6926	1.29732
	5.58286	5.42189	5.69897	1.29885
	5.61282	5.43297	5.73357	1.29973
	5.61543	5.44585	5.74391	1.29973
	5.65191	5.44892	5.75019	1.3006
	5.65886	5.45096	5.77281	1.30103
	5.6771	5.46802	5.79144	1.30103
	5.68318	5.46911	5.79559	1.30103
	5.69794	5.49305	5.80344	1.30103
	5.69968	5.49485	5.81025	1.30103
	5.70098	5.60206	5.82987	1.30103
	5.74528	5.60595	5.89835	1.30103
	5.77655	5.61066	5.90317	1.30103
	5.84951	5.66455	5.96825	1.30103
	5.99804	5.6926	5.98437	1.30146
	6.0115	5.69897	5.99823	1.30255
	6.03713	5.73357	6.0196	1.30514
	6.06579	5.74391	6.18648	1.30514
	6.06753	5.75019	6.24304	1.30514
	6.07665	5.77281	6.26568	1.30535
	6.07665	5.79144	6.35906	1.30814
	6.11313	5.79559	6.51452	1.30856
	6.13962	5.80344	6.58258	1.31175
	6.14223	5.81025	6.67669	1.31366
	6.19217	5.82987		1.31387
	6.28772	5.89835		1.31513
	6.32116	5.90317		1.31534
	6.36676	5.96825		1.31576
	6.39976	5.98437		1.31576
	6.40628	5.99823		1.31639
	6.40628	6.0196		1.3166
	6.43234	6.18648		1.31681
	6.56957	6.24304		1.32222
	6.94133	6.26568		1.32449
		6.35906		1.32634
		6.51452		1.32634
		6.58258		1.32838
		6.67669		1.32838
				1.32838
				1.33001
				1.33041
				1.33244
				1.33365
				1.33606
				1.33746
				1.34044
				1.34044
				1.34084
				1.34124
				1.34223
				1.34223
				1.34223
				1.34223
				1.34301
				1.34321
				1.34498
				1.34498
				1.34733
				1.34733
				1.35005
				1.35218
				1.35218
				1.35583
				1.35622
				1.3566
				1.35793
				1.35813
				1.35984
				1.35984
				1.36173
				1.36173
				1.36173
				1.36173
				1.36173
				1.36173
				1.36192
				1.36267
				1.36267
				1.36305
				1.36474
				1.36736
				1.36847
				1.37107
				1.37218
				1.37236
				1.37438
				1.37621
				1.37658
				1.37803
				1.3784
				1.37858
				1.38003
				1.38003
				1.38003
				1.38003
				1.38112
				1.38952
				1.3927
				1.39602
				1.39637
				1.39637
				1.39794
				1.39794
				1.39794
				1.39794
				1.39794
				1.39794
				1.39881
				1.4014
				1.4014
				1.4014
				1.4014
				1.4014
				1.4014
				1.40261
				1.40483
				1.40654
				1.40773
				1.41111
				1.41347
				1.41347
				1.41414
				1.41414
				1.41497
				1.41514
				1.41747
				1.41929
				1.4216
				1.4216
				1.42325
				1.42325
				1.42325
				1.42325
				1.42894
				1.42975
				1.42975
				1.4312
				1.43136
				1.43136
				1.43136
				1.43136
				1.43136
				1.43233
				1.43281
				1.43297
				1.43345
				1.43457
				1.43505
				1.43696
				1.43854
				1.43933
				1.43933
				1.43933
				1.43996
				1.44059
				1.44217
				1.44279
				1.44451
				1.4456
				1.44592
				1.44638
				1.44716
				1.44716
				1.44716
				1.44731
				1.4504
				1.45102
				1.45133
				1.45179
				1.45393
				1.45408
				1.45469
				1.45637
				1.45637
				1.45697
				1.45788
				1.4609
				1.4609
				1.4609
				1.4609
				1.4609
				1.46255
				1.46359
				1.46523
				1.46523
				1.46523
				1.46687
				1.4682
				1.46967
				1.46967
				1.46982
				1.47276
				1.47276
				1.47407
				1.47611
				1.47698
				1.47712
				1.47712
				1.47712
				1.47914
				1.48273
				1.48273
				1.4833
				1.4843
				1.48544
				1.48558
				1.48714
				1.4877
				1.48855
				1.49038
				1.49066
				1.49443
				1.49457
				1.49845
				1.49914
				1.49969
				1.50515
				1.50745
				1.50974
				1.51055
				1.51175
				1.51175
				1.51308
				1.5172
				1.5172
				1.51838
				1.51838
				1.51983
				1.52244
				1.5244
				1.52504
				1.52504
				1.52737
				1.52879
				1.53148
				1.53148
				1.53681
				1.53694
				1.53782
				1.53882
				1.53908
				1.54145
				1.54258
				1.54258
				1.54258
				1.54258
				1.54258
				1.54258
				1.54295
				1.54332
				1.54382
				1.54394
				1.54394
				1.54704
				1.54704
				1.54827
				1.54998
				1.55011
				1.55315
				1.55315
				1.55473
				1.55618
				1.55618
				1.55618
				1.55618
				1.55618
				1.55618
				1.55618
				1.55678
				1.55871
				1.55967
				1.56015
				1.56146
				1.56253
				1.56277
				1.56419
				1.56526
				1.56573
				1.56667
				1.56679
				1.5682
				1.5682
				1.56832
				1.56926
				1.56937
				1.57008
				1.57101
				1.57171
				1.57403
				1.57623
				1.57875
				1.57978
				1.57978
				1.58001
				1.58309
				1.5832
				1.58805
				1.58906
				1.5895
				1.5895
				1.58984
				1.59095
				1.59095
				1.59095
				1.59095
				1.59095
				1.59095
				1.59095
				1.59095
				1.59095
				1.59118
				1.59417
				1.59506
				1.5966
				1.59759
				1.59956
				1.60032
				1.60054
				1.6013
				1.60206
				1.60206
				1.60206
				1.60206
				1.60206
				1.60206
				1.60206
				1.60206
				1.60206
				1.60206
				1.60206
				1.60206
				1.60206
				1.60206
				1.60206
				1.60206
				1.60206
				1.60206
				1.60206
				1.60206
				1.60206
				1.60206
				1.60206
				1.60206
				1.60206
				1.60206
				1.60638
				1.6066
				1.60949
				1.60991
				1.61002
				1.61278
				1.61278
				1.61278
				1.61278
				1.61448
				1.61479
				1.61899
				1.61899
				1.61982
				1.62024
				1.62045
				1.6217
				1.6217
				1.6217
				1.62315
				1.62315
				1.62315
				1.62315
				1.62335
				1.62469
				1.62531
				1.62685
				1.62685
				1.62726
				1.62839
				1.62839
				1.62839
				1.62839
				1.62839
				1.62839
				1.6287
				1.62921
				1.63022
				1.63144
				1.63144
				1.63195
				1.63195
				1.63215
				1.63347
				1.63377
				1.63397
				1.63417
				1.63498
				1.63579
				1.63629
				1.63988
				1.63998
				1.64098
				1.64108
				1.64187
				1.64197
				1.64611
				1.6467
				1.64895
				1.64972
				1.65128
				1.65167
				1.65273
				1.65321
				1.65389
				1.65418
				1.65466
				1.65514
				1.65514
				1.65763
				1.65801
				1.66124
				1.6637
				1.66464
				1.66558
				1.66586
				1.66745
				1.66932
				1.67025
				1.67191
				1.6721
				1.6721
				1.67302
				1.67357
				1.67394
				1.67394
				1.67578
				1.67669
				1.67879
				1.67934
				1.67952
				1.68124
				1.68124
				1.6826
				1.68476
				1.68975
				1.68993
				1.69011
				1.69073
				1.69073
				1.69117
				1.69241
				1.69311
				1.69434
				1.69461
				1.69548
				1.6981
				1.69819
				1.69827
				1.69888
				1.69888
				1.69888
				1.69888
				1.69888
				1.69888
				1.69888
				1.69888
				1.69888
				1.69888
				1.69888
				1.69923
				1.70183
				1.70243
				1.70286
				1.70321
				1.70441
				1.70441
				1.70526
				1.70586
				1.70586
				1.70603
				1.70749
				1.70851
				1.70927
				1.71374
				1.71391
				1.716
				1.716
				1.716
				1.71617
				1.71775
				1.71784
				1.71784
				1.718
				1.71875
				1.71883
				1.71958
				1.72016
				1.72016
				1.72066
				1.72099
				1.72115
				1.72214
				1.72403
				1.72428
				1.7264
				1.72835
				1.72835
				1.72916
				1.72916
				1.73054
				1.73086
				1.73086
				1.73312
				1.7332
				1.73504
				1.73608
				1.73886
				1.73941
				1.74028
				1.74028
				1.74028
				1.74028
				1.74028
				1.74028
				1.74036
				1.74186
				1.7421
				1.74273
				1.74586
				1.74632
				1.74718
				1.74819
				1.7502
				1.75289
				1.75572
				1.75587
				1.75587
				1.75641
				1.75664
				1.75906
				1.75959
				1.75967
				1.75989
				1.76042
				1.7605
				1.76155
				1.76559
				1.76671
				1.7679
				1.76856
				1.77012
				1.77085
				1.77305
				1.7767
				1.77728
				1.77808
				1.77808
				1.77808
				1.77808
				1.77808
				1.77808
				1.77859
				1.77873
				1.77887
				1.77938
				1.77952
				1.77967
				1.78147
				1.78176
				1.78176
				1.78176
				1.78176
				1.78176
				1.78176
				1.78176
				1.78176
				1.78176
				1.78176
				1.78176
				1.78176
				1.78226
				1.7834
				1.78347
				1.78412
				1.78625
				1.78888
				1.78951
				1.79155
				1.7933
				1.7956
				1.79588
				1.79588
				1.79588
				1.79657
				1.79741
				1.79927
				1.79927
				1.79989
				1.80044
				1.80127
				1.80284
				1.80339
				1.80387
				1.80468
				1.80665
				1.80814
				1.80956
				1.81231
				1.81291
				1.81644
				1.81677
				1.81981
				1.81994
				1.82086
				1.8221
				1.8221
				1.82276
				1.82458
				1.82718
				1.82763
				1.8293
				1.82963
				1.83008
				1.83245
				1.83245
				1.83245
				1.83245
				1.83245
				1.83257
				1.83455
				1.83563
				1.83563
				1.83727
				1.83727
				1.83759
				1.83885
				1.83923
				1.83948
				1.84067
				1.84255
				1.84354
				1.84361
				1.84398
				1.84473
				1.8451
				1.8451
				1.8451
				1.84522
				1.84566
				1.84634
				1.84658
				1.84658
				1.84745
				1.84979
				1.85071
				1.85083
				1.85095
				1.8512
				1.85126
				1.85126
				1.85138
				1.85175
				1.85199
				1.85248
				1.85303
				1.85315
				1.85455
				1.85673
				1.85769
				1.86326
				1.86534
				1.8657
				1.8657
				1.8657
				1.8657
				1.8657
				1.8657
				1.8657
				1.8657
				1.8657
				1.8657
				1.86729
				1.86776
				1.86923
				1.87373
				1.8739
				1.87431
				1.87506
				1.87506
				1.87506
				1.87506
				1.87506
				1.87581
				1.87835
				1.87846
				1.87933
				1.87967
				1.88366
				1.88502
				1.8857
				1.88649
				1.88649
				1.88649
				1.88649
				1.88649
				1.88649
				1.88649
				1.88649
				1.88649
				1.88649
				1.88649
				1.88649
				1.88649
				1.88649
				1.88649
				1.88649
				1.88649
				1.88649
				1.88649
				1.88649
				1.89042
				1.8926
				1.8936
				1.89459
				1.89636
				1.89675
				1.89757
				1.89829
				1.90053
				1.90162
				1.90162
				1.90195
				1.90309
				1.90309
				1.90612
				1.9066
				1.90768
				1.90843
				1.9094
				1.9111
				1.91126
				1.9127
				1.91376
				1.91387
				1.91808
				1.91908
				1.91908
				1.92179
				1.92184
				1.92231
				1.92278
				1.92407
				1.92763
				1.92788
				1.9284
				1.92916
				1.92937
				1.92937
				1.92937
				1.93197
				1.93197
				1.93242
				1.93247
				1.93323
				1.93445
				1.9346
				1.93877
				1.93922
				1.94027
				1.94196
				1.94216
				1.94409
				1.94414
				1.94443
				1.94675
				1.94939
				1.94939
				1.94939
				1.94939
				1.94939
				1.94939
				1.94939
				1.94939
				1.94939
				1.94939
				1.95109
				1.95139
				1.95347
				1.95419
				1.95419
				1.95419
				1.95419
				1.95419
				1.95419
				1.95419
				1.95419
				1.95419
				1.95448
				1.95713
				1.95895
				1.96061
				1.96137
				1.96232
				1.96379
				1.96379
				1.9644
				1.96525
				1.96614
				1.96685
				1.96703
				1.96881
				1.97058
				1.97118
				1.9722
				1.97239
				1.97308
				1.97387
				1.97772
				1.97782
				1.9795
				1.98064
				1.98137
				1.98223
				1.98448
				1.98623
				1.98686
				1.98807
				1.989
				1.989
				1.99388
				1.998
				1.99909
				2
				2
				2
				2
				2
				2
				2
				2
				2
				2
				2
				2.00009
				2.00156
				2.00277
				2.00359
				2.00372
				2.0086
				2.00924
				2.00979
				2.01068
				2.01072
				2.01072
				2.0128
				2.0167
				2.01774
				2.01828
				2.01966
				2.0197
				2.02181
				2.02255
				2.02457
				2.02531
				2.02633
				2.02792
				2.03141
				2.03149
				2.03193
				2.03342
				2.03342
				2.03342
				2.03483
				2.03667
				2.03794
				2.03866
				2.0393
				2.04305
				2.04344
				2.04395
				2.04517
				2.04646
				2.04774
				2.04902
				2.0491
				2.04922
				2.04922
				2.04922
				2.04922
				2.04999
				2.05088
				2.05127
				2.05542
				2.05614
				2.0569
				2.0571
				2.05839
				2.05862
				2.05881
				2.05922
				2.06296
				2.06412
				2.06819
				2.06856
				2.06893
				2.06948
				2.07225
				2.07372
				2.07372
				2.07408
				2.0766
				2.07918
				2.07918
				2.07918
				2.07918
				2.07918
				2.0798
				2.0807
				2.08084
				2.08192
				2.08279
				2.08636
				2.08739
				2.08884
				2.08991
				2.08991
				2.09001
				2.09321
				2.09493
				2.09513
				2.09545
				2.09555
				2.09885
				2.0994
				2.10233
				2.10309
				2.10377
				2.10404
				2.10636
				2.10721
				2.10752
				2.11059
				2.11227
				2.11321
				2.11378
				2.11391
				2.11391
				2.11498
				2.1173
				2.11843
				2.11985
				2.12156
				2.12199
				2.12385
				2.12437
				2.12542
				2.1271
				2.12911
				2.1303
				2.13354
				2.13481
				2.13504
				2.13773
				2.1384
				2.13897
				2.14051
				2.1407
				2.14076
				2.14613
				2.14675
				2.14768
				2.14814
				2.14873
				2.14873
				2.14919
				2.15381
				2.15436
				2.15561
				2.158
				2.15836
				2.15854
				2.16077
				2.16134
				2.16435
				2.16578
				2.16835
				2.169
				2.17099
				2.17351
				2.17383
				2.17609
				2.17609
				2.17609
				2.17609
				2.17609
				2.17609
				2.17609
				2.17609
				2.17609
				2.17609
				2.17609
				2.17748
				2.17947
				2.18113
				2.18179
				2.18179
				2.18256
				2.19033
				2.19033
				2.19173
				2.19179
				2.19248
				2.19728
				2.19764
				2.19866
				2.19866
				2.20129
				2.20129
				2.20129
				2.20129
				2.20265
				2.20268
				2.20412
				2.20412
				2.20526
				2.21018
				2.21474
				2.21484
				2.21577
				2.21748
				2.21748
				2.21846
				2.21854
				2.21906
				2.22427
				2.22528
				2.22541
				2.22544
				2.22544
				2.22544
				2.22544
				2.22544
				2.22544
				2.22639
				2.22863
				2.22925
				2.22968
				2.22978
				2.23109
				2.233
				2.23676
				2.23779
				2.2392
				2.23955
				2.24017
				2.24077
				2.24157
				2.24281
				2.24304
				2.24309
				2.24329
				2.24881
				2.24917
				2.25062
				2.25149
				2.25527
				2.25585
				2.25924
				2.26007
				2.26086
				2.26387
				2.26712
				2.26717
				2.26888
				2.26895
				2.27298
				2.27499
				2.2757
				2.27875
				2.27882
				2.28321
				2.2833
				2.2833
				2.28421
				2.28477
				2.287
				2.2878
				2.28876
				2.29092
				2.29212
				2.29394
				2.29555
				2.29667
				2.29667
				2.29667
				2.29667
				2.29667
				2.29667
				2.29804
				2.30103
				2.30103
				2.30103
				2.30103
				2.30103
				2.30103
				2.30155
				2.30172
				2.30222
				2.30296
				2.3032
				2.30352
				2.306
				2.3075
				2.30807
				2.3091
				2.30963
				2.31122
				2.31175
				2.31175
				2.31387
				2.31471
				2.31622
				2.31658
				2.31844
				2.31869
				2.31956
				2.32116
				2.32116
				2.32116
				2.32222
				2.3249
				2.32554
				2.32634
				2.32634
				2.32838
				2.32875
				2.32891
				2.33049
				2.33244
				2.33262
				2.33282
				2.33284
				2.33646
				2.34145
				2.3424
				2.3424
				2.34319
				2.34498
				2.34588
				2.3459
				2.34801
				2.34936
				2.35025
				2.35083
				2.35218
				2.35218
				2.35218
				2.35218
				2.35218
				2.35253
				2.35361
				2.35601
				2.35601
				2.35601
				2.35627
				2.35696
				2.36173
				2.36173
				2.36173
				2.36229
				2.36324
				2.36549
				2.36661
				2.36951
				2.37568
				2.37747
				2.3805
				2.38236
				2.38593
				2.38614
				2.38668
				2.39176
				2.39508
				2.39585
				2.39618
				2.39648
				2.39658
				2.39707
				2.39794
				2.39794
				2.39794
				2.39794
				2.39794
				2.39794
				2.39881
				2.39893
				2.40019
				2.4014
				2.4014
				2.40403
				2.40494
				2.40598
				2.40678
				2.40719
				2.40729
				2.40953
				2.41074
				2.41164
				2.41365
				2.41497
				2.41497
				2.41602
				2.41746
				2.42032
				2.42053
				2.42118
				2.42152
				2.4221
				2.4231
				2.42387
				2.42493
				2.42623
				2.42731
				2.42828
				2.43367
				2.43383
				2.43541
				2.43696
				2.44224
				2.44306
				2.44404
				2.44697
				2.44716
				2.44716
				2.44935
				2.44999
				2.45051
				2.4508
				2.45102
				2.45162
				2.45214
				2.45408
				2.45483
				2.45483
				2.45483
				2.45483
				2.45483
				2.45483
				2.45483
				2.45483
				2.45483
				2.45483
				2.45483
				2.45483
				2.45483
				2.45483
				2.45483
				2.45483
				2.45483
				2.45529
				2.4562
				2.46001
				2.46271
				2.46389
				2.46498
				2.46752
				2.46876
				2.47053
				2.47129
				2.47353
				2.47712
				2.47712
				2.47826
				2.4807
				2.48572
				2.4864
				2.48878
				2.48971
				2.49077
				2.49484
				2.49495
				2.49697
				2.49831
				2.49969
				2.501
				2.50303
				2.50791
				2.51042
				2.51042
				2.51115
				2.51187
				2.51202
				2.5123
				2.51388
				2.51418
				2.51461
				2.51696
				2.51735
				2.52229
				2.52244
				2.53129
				2.53145
				2.53403
				2.53443
				2.54074
				2.54109
				2.54317
				2.54406
				2.54448
				2.54704
				2.54817
				2.55204
				2.55297
				2.55363
				2.55471
				2.55618
				2.55704
				2.55706
				2.55861
				2.56083
				2.5613
				2.56229
				2.56273
				2.56536
				2.56805
				2.57167
				2.57402
				2.57402
				2.57403
				2.57978
				2.58206
				2.58311
				2.58545
				2.58552
				2.58681
				2.58731
				2.5896
				2.59106
				2.59549
				2.59604
				2.59701
				2.59766
				2.59879
				2.59879
				2.6006
				2.60206
				2.60206
				2.60206
				2.60206
				2.60206
				2.60206
				2.60206
				2.60327
				2.60565
				2.60565
				2.60576
				2.61056
				2.61265
				2.61638
				2.6217
				2.62324
				2.62324
				2.62839
				2.62922
				2.63108
				2.63138
				2.63241
				2.63467
				2.63679
				2.63753
				2.64146
				2.64246
				2.64246
				2.64718
				2.64835
				2.64935
				2.65031
				2.65321
				2.65321
				2.65856
				2.65898
				2.65961
				2.66052
				2.66275
				2.66468
				2.66521
				2.66745
				2.66758
				2.66799
				2.66862
				2.6721
				2.67295
				2.67297
				2.67401
				2.67536
				2.6804
				2.68149
				2.68305
				2.68541
				2.68574
				2.68874
				2.69241
				2.69723
				2.69896
				2.69896
				2.69896
				2.69896
				2.69896
				2.69896
				2.69896
				2.69896
				2.70082
				2.7023
				2.70626
				2.70757
				2.708
				2.71516
				2.7168
				2.71965
				2.72153
				2.72497
				2.72774
				2.72996
				2.73284
				2.73406
				2.73546
				2.73672
				2.74035
				2.74114
				2.74411
				2.74497
				2.74663
				2.75315
				2.75319
				2.7537
				2.75543
				2.75594
				2.75785
				2.758
				2.76574
				2.76641
				2.7727
				2.77388
				2.77657
				2.77814
				2.77814
				2.77814
				2.77814
				2.77976
				2.78066
				2.78104
				2.78532
				2.7871
				2.78888
				2.79371
				2.79445
				2.79581
				2.79669
				2.79719
				2.79964
				2.80561
				2.80917
				2.8109
				2.8129
				2.8129
				2.81291
				2.81698
				2.81759
				2.82337
				2.82347
				2.82545
				2.82672
				2.8293
				2.83558
				2.84039
				2.84162
				2.84323
				2.8451
				2.8451
				2.84748
				2.85217
				2.85381
				2.85402
				2.85405
				2.85521
				2.85749
				2.86213
				2.86261
				2.86332
				2.86541
				2.86688
				2.87094
				2.87238
				2.87337
				2.87475
				2.87506
				2.87506
				2.87551
				2.87795
				2.87839
				2.87883
				2.88263
				2.88273
				2.89063
				2.89095
				2.89119
				2.89419
				2.89479
				2.89819
				2.8984
				2.90009
				2.90149
				2.90196
				2.90263
				2.90279
				2.90309
				2.90309
				2.90393
				2.90472
				2.90472
				2.90472
				2.90645
				2.90849
				2.90903
				2.90911
				2.91036
				2.91225
				2.91465
				2.91625
				2.91633
				2.91654
				2.91854
				2.92001
				2.92985
				2.93449
				2.9375
				2.93789
				2.94101
				2.94136
				2.94492
				2.94727
				2.94766
				2.94821
				2.95193
				2.95312
				2.95423
				2.95423
				2.95424
				2.95591
				2.95616
				2.95695
				2.95713
				2.95766
				2.96019
				2.9619
				2.96593
				2.96735
				2.96828
				2.96856
				2.96965
				2.97243
				2.97879
				2.98142
				2.98397
				2.98408
				2.98871
				2.98914
				2.98925
				2.99011
				2.9942
				2.99621
				2.99669
				2.99669
				2.99669
				2.99669
				2.99669
				2.99669
				2.99721
				2.99927
				3
				3
				3
				3
				3
				3.00448
				3.01304
				3.01703
				3.0218
				3.02312
				3.02407
				3.02531
				3.02841
				3.03415
				3.03833
				3.04045
				3.04051
				3.04074
				3.04198
				3.04371
				3.044
				3.04618
				3.04806
				3.05038
				3.0549
				3.0559
				3.05792
				3.05915
				3.0607
				3.06289
				3.06352
				3.06963
				3.07035
				3.07038
				3.07348
				3.07445
				3.07918
				3.07918
				3.08085
				3.08085
				3.08157
				3.08178
				3.08263
				3.08636
				3.08976
				3.09167
				3.09651
				3.09691
				3.09691
				3.09919
				3.09939
				3.09968
				3.10037
				3.1013
				3.10295
				3.10341
				3.10721
				3.11394
				3.11394
				3.1151
				3.1155
				3.12262
				3.1271
				3.13138
				3.13201
				3.13513
				3.14326
				3.1446
				3.14484
				3.14494
				3.14557
				3.14613
				3.14613
				3.14782
				3.14834
				3.15539
				3.15908
				3.1598
				3.16055
				3.16447
				3.16605
				3.16894
				3.17151
				3.17319
				3.17536
				3.17609
				3.17609
				3.17609
				3.17609
				3.17666
				3.17707
				3.17776
				3.17946
				3.17946
				3.18374
				3.18578
				3.18733
				3.18752
				3.18773
				3.1938
				3.19546
				3.19575
				3.19788
				3.20112
				3.20155
				3.20613
				3.20618
				3.20658
				3.20866
				3.21285
				3.21616
				3.21697
				3.22115
				3.22199
				3.22208
				3.22264
				3.22401
				3.22423
				3.2264
				3.23041
				3.23109
				3.23607
				3.24158
				3.24242
				3.24304
				3.24304
				3.24304
				3.24457
				3.2464
				3.24652
				3.24797
[truncated: 404 more rows]
