# Supplementary material for: Nonplantigrade Foot Posture: A Constraint on Dinosaur Body Size
Source: PLoS One. 2016 Jan 20;11(1):e0145716. doi: 10.1371/journal.pone.0145716 (PMC4720450; doi:10.1371/journal.pone.0145716)
Supplement: S5 Table — (XLSX) [file pone.0145716.s006.xlsx]

## Sheet: S5
S5 Table. Femur lengths of archosauromorphs and therapsids from the Middle Triassic to the Middle Jurassic.
See refereces and Supplementary references for data sources
Museum abbreviation PVSJ: Museo de Ciencias Naturales, Universidad Nacional de San Juan, San Juan, Argentina
Genus	Species	Clade for evolutionary model fitting	Grouping for additional model fitting	Femur length (mm)	Source	Age	Lower Stage Start (Ma)	Upper Stage End (Ma)	Midpoint (Ma)
Eustreptospondylus	oxoniensis	Non-plantigrades (Dinosauromorpha + Scleromochlus)		510	6	late Callovian	164.8	163.5	164.15
Callovosaurus	leedsi	Non-plantigrades (Dinosauromorpha + Scleromochlus)		311	6	middle Callovian	165.233	164.367	164.8
Loricatosaurus	priscus	Non-plantigrades (Dinosauromorpha + Scleromochlus)		910	6	middle Callovian	165.233	164.367	164.8
Cetiosauriscus	stewarti	Non-plantigrades (Dinosauromorpha + Scleromochlus)		1360	6	middle Callovian	165.233	164.367	164.8
Piatnitzkysaurus	floresi	Non-plantigrades (Dinosauromorpha + Scleromochlus)		570	6	Callovian	166.1	163.5	164.8
Ferganasaurus	verzilini	Non-plantigrades (Dinosauromorpha + Scleromochlus)		1209	6	Callovian	166.1	163.5	164.8
Patagosaurus	fariasi	Non-plantigrades (Dinosauromorpha + Scleromochlus)		1542	6	Callovian	166.1	163.5	164.8
Volkheimeria	chubutensis	Non-plantigrades (Dinosauromorpha + Scleromochlus)		640	6	Callovian	166.1	163.5	164.8
Condorraptor	currumili	Non-plantigrades (Dinosauromorpha + Scleromochlus)		540	6	Callovian	166.1	163.5	164.8
Atlasaurus	imelakei	Non-plantigrades (Dinosauromorpha + Scleromochlus)		1943.04	6	Bathonian-Callovian	168.3	163.5	165.9
Bellusaurus	sui	Non-plantigrades (Dinosauromorpha + Scleromochlus)		550	6	Bathonian-Callovian	168.3	163.5	165.9
Klamelisaurus	gobiensis	Non-plantigrades (Dinosauromorpha + Scleromochlus)		1200	6	Bathonian-Callovian	168.3	163.5	165.9
Monolophosaurus	jiangi	Non-plantigrades (Dinosauromorpha + Scleromochlus)		505	6	Bathonian-Callovian	168.3	163.5	165.9
Megalosaurus	bucklandii	Non-plantigrades (Dinosauromorpha + Scleromochlus)		830	6	middle Bathonian	167.567	166.833	167.2
Poekilopleuron	bucklandii	Non-plantigrades (Dinosauromorpha + Scleromochlus)		1000	6	middle Bathonian	167.567	166.833	167.2
Cetiosaurus	mogrebiensis	Non-plantigrades (Dinosauromorpha + Scleromochlus)		1600	6	Bathonian	168.3	166.1	167.2
Dubreuilosaurus	valesdunensis	Non-plantigrades (Dinosauromorpha + Scleromochlus)		450	7	Bathonian	168.3	166.1	167.2
Cetiosaurus	oxoniensis	Non-plantigrades (Dinosauromorpha + Scleromochlus)		1369	6	Bajocian-Bathonian	170.3	166.1	168.2
Duriavenator	hesperis	Non-plantigrades (Dinosauromorpha + Scleromochlus)		750	6	late Bajocian	169.3	168.3	168.8
Eomamenchisaurus	yuanmouensis	Non-plantigrades (Dinosauromorpha + Scleromochlus)		1100	6	Middle Jurassic (Aalenian-Callovian)	174.1	163.5	168.8
Spinophorosaurus	nigerensis	Non-plantigrades (Dinosauromorpha + Scleromochlus)		1215	6	Middle Jurassic (Aalenian-Callovian)	174.1	163.5	168.8
Yuanmousaurus	jiangyiensis	Non-plantigrades (Dinosauromorpha + Scleromochlus)		1370	6	Middle Jurassic (Aalenian-Callovian)	174.1	163.5	168.8
Agilisaurus	louderbacki	Non-plantigrades (Dinosauromorpha + Scleromochlus)		198.5	6	Bajocian	170.3	168.3	169.3
Hexinlusaurus	multidens	Non-plantigrades (Dinosauromorpha + Scleromochlus)		210	6	Bajocian	170.3	168.3	169.3
Huayangosaurus	taibaii	Non-plantigrades (Dinosauromorpha + Scleromochlus)		575	6	Bajocian	170.3	168.3	169.3
Xiaosaurus	dashanpensis	Non-plantigrades (Dinosauromorpha + Scleromochlus)		110	6	Bajocian	170.3	168.3	169.3
Dashanpusaurus	dongi	Non-plantigrades (Dinosauromorpha + Scleromochlus)		989	6	Bajocian	170.3	168.3	169.3
Datousaurus	bashanensis	Non-plantigrades (Dinosauromorpha + Scleromochlus)		1192	6	Bajocian	170.3	168.3	169.3
Omeisaurus	tianfuensis	Non-plantigrades (Dinosauromorpha + Scleromochlus)		1265	6	Bajocian	170.3	168.3	169.3
Rhoetosaurus	brownei	Non-plantigrades (Dinosauromorpha + Scleromochlus)		1525	6	Bajocian	170.3	168.3	169.3
Shunosaurus	lii	Non-plantigrades (Dinosauromorpha + Scleromochlus)		1250	6	Bajocian	170.3	168.3	169.3
Chuandongocoelurus	primitivus	Non-plantigrades (Dinosauromorpha + Scleromochlus)		200	6	Bajocian	170.3	168.3	169.3
Gasosaurus	constructus	Non-plantigrades (Dinosauromorpha + Scleromochlus)		441	6	Bajocian	170.3	168.3	169.3
Magnosaurus	nethercombensis	Non-plantigrades (Dinosauromorpha + Scleromochlus)		543	6	Bajocian	170.3	168.3	169.3
Eoabelisaurus	mefi	Non-plantigrades (Dinosauromorpha + Scleromochlus)		640	4	Aalenian-Bajocian	174.1	168.3	171.2
Tazoudasaurus	naimi	Non-plantigrades (Dinosauromorpha + Scleromochlus)		1230	6	Pliensbachian-Toarcian	190.8	174.1	182.45
Berberosaurus	liassicus	Non-plantigrades (Dinosauromorpha + Scleromochlus)		617	6	Pliensbachian-Toarcian	190.8	174.1	182.45
Segisaurus	halli	Non-plantigrades (Dinosauromorpha + Scleromochlus)		142.9	6	Pliensbachian-Toarcian	190.8	174.1	182.45
Adeopapposaurus	mognai	Non-plantigrades (Dinosauromorpha + Scleromochlus)		227	6	Early Jurassic (Hettangian-Toarcian)	201.3	174.1	187.7
Anchisaurus	polyzelus	Non-plantigrades (Dinosauromorpha + Scleromochlus)		280	6	Early Jurassic (Hettangian-Toarcian)	201.3	174.1	187.7
Barapasaurus	tagorei	Non-plantigrades (Dinosauromorpha + Scleromochlus)		1365	6	Early Jurassic (Hettangian-Toarcian)	201.3	174.1	187.7
Gongxianosaurus	shibeiensis	Non-plantigrades (Dinosauromorpha + Scleromochlus)		1164	6	Early Jurassic (Hettangian-Toarcian)	201.3	174.1	187.7
Kotasaurus	yamanpalliensis	Non-plantigrades (Dinosauromorpha + Scleromochlus)		1130	6	Early Jurassic (Hettangian-Toarcian)	201.3	174.1	187.7
Vulcanodon	karibaensis	Non-plantigrades (Dinosauromorpha + Scleromochlus)		1100	6	Early Jurassic (Hettangian-Toarcian)	201.3	174.1	187.7
Cryolophosaurus	ellioti	Non-plantigrades (Dinosauromorpha + Scleromochlus)		769	6	Early Jurassic (Hettangian-Toarcian)	201.3	174.1	187.7
Dilophosaurus	sinensis	Non-plantigrades (Dinosauromorpha + Scleromochlus)		590	6	Early Jurassic (Hettangian-Toarcian)	201.3	174.1	187.7
Scutellosaurus	lawleri	Non-plantigrades (Dinosauromorpha + Scleromochlus)		114	6	Sinemurian-Pliensbachian	199.3	182.7	191
Sarahsaurus	aurifontanalis	Non-plantigrades (Dinosauromorpha + Scleromochlus)		343	6	Sinemurian-Pliensbachian	199.3	182.7	191
Coelophysis	kayentakatae	Non-plantigrades (Dinosauromorpha + Scleromochlus)		270	6	Sinemurian-Pliensbachian	199.3	182.7	191
Dilophosaurus	wetherilli	Non-plantigrades (Dinosauromorpha + Scleromochlus)		610	6	Sinemurian-Pliensbachian	199.3	182.7	191
Scelidosaurus	harrisonii	Non-plantigrades (Dinosauromorpha + Scleromochlus)		403	6	Sinemurian	199.3	190.8	195.05
Gyposaurus	capensis	Non-plantigrades (Dinosauromorpha + Scleromochlus)		1360	6	Sinemurian	199.3	190.8	195.05
Lamplughsaura	dharmaramensis	Non-plantigrades (Dinosauromorpha + Scleromochlus)		630	6	Sinemurian	199.3	190.8	195.05
Sarcosaurus	woodi	Non-plantigrades (Dinosauromorpha + Scleromochlus)		331	6	Sinemurian	199.3	190.8	195.05
Abrictosaurus	consors	Non-plantigrades (Dinosauromorpha + Scleromochlus)		77.1	6	Hettangian-Sinemurian	201.3	190.8	196.05
Heterodontosaurus	tucki	Non-plantigrades (Dinosauromorpha + Scleromochlus)		195	6	Hettangian-Sinemurian	201.3	190.8	196.05
Lesothosaurus	diagnosticus	Non-plantigrades (Dinosauromorpha + Scleromochlus)		104	6	Hettangian-Sinemurian	201.3	190.8	196.05
Lycorhinus	angustidens	Non-plantigrades (Dinosauromorpha + Scleromochlus)		112	6	Hettangian-Sinemurian	201.3	190.8	196.05
Stormbergia	dangershoeki	Non-plantigrades (Dinosauromorpha + Scleromochlus)		202	6	Hettangian-Sinemurian	201.3	190.8	196.05
Aardonyx	celestae	Non-plantigrades (Dinosauromorpha + Scleromochlus)		681	6	Hettangian-Sinemurian	201.3	190.8	196.05
Ignavusaurus	rachelis	Non-plantigrades (Dinosauromorpha + Scleromochlus)		152.7	6	Hettangian-Sinemurian	201.3	190.8	196.05
Jingshanosaurus	xinwaensis	Non-plantigrades (Dinosauromorpha + Scleromochlus)		845	6	Hettangian-Sinemurian	201.3	190.8	196.05
Lufengosaurus	huenei	Non-plantigrades (Dinosauromorpha + Scleromochlus)		780	6	Hettangian-Sinemurian	201.3	190.8	196.05
Massospondylus	carinatus	Non-plantigrades (Dinosauromorpha + Scleromochlus)		335	6	Hettangian-Sinemurian	201.3	190.8	196.05
Melanorosaurus	thabanensis	Non-plantigrades (Dinosauromorpha + Scleromochlus)		516	6	Hettangian-Sinemurian	201.3	190.8	196.05
Xixiposaurus	suni	Non-plantigrades (Dinosauromorpha + Scleromochlus)		428	6	Hettangian-Sinemurian	201.3	190.8	196.05
Yunnanosaurus	huangi	Non-plantigrades (Dinosauromorpha + Scleromochlus)		435	6	Hettangian-Sinemurian	201.3	190.8	196.05
Coelophysis	rhodesiensis	Non-plantigrades (Dinosauromorpha + Scleromochlus)		208	6	Hettangian-Sinemurian	201.3	190.8	196.05
Dracovenator	regenti	Non-plantigrades (Dinosauromorpha + Scleromochlus)		617	6	Hettangian-Sinemurian	201.3	190.8	196.05
Laquintasaura	venezuelae	Non-plantigrades (Dinosauromorpha + Scleromochlus)		90	44	latest Rhaetian-early Hettangian	201.3	199.3	200.3
Camelotia	borealis	Non-plantigrades (Dinosauromorpha + Scleromochlus)		1008	6	Rhaetian	208.5	201.3	204.9
Thecodontosaurus	antiquus	Non-plantigrades (Dinosauromorpha + Scleromochlus)		210	6	Rhaetian	208.5	201.3	204.9
Pantydraco	caducus	Non-plantigrades (Dinosauromorpha + Scleromochlus)		72	6	Rhaetian	208.5	201.3	204.9
Eocursor	parvus	Non-plantigrades (Dinosauromorpha + Scleromochlus)		109	6	late Norian-Rhaetian	217.75	201.3	209.525
Antetonitrus	ingenipes	Non-plantigrades (Dinosauromorpha + Scleromochlus)		794	6	late Norian-Rhaetian	217.75	201.3	209.525
Isanosaurus	attavipachi	Non-plantigrades (Dinosauromorpha + Scleromochlus)		760	6	late Norian-Rhaetian	217.75	201.3	209.525
Plateosauravus	cullingworthi	Non-plantigrades (Dinosauromorpha + Scleromochlus)		600	6	late Norian-Rhaetian	217.75	201.3	209.525
Plateosaurus	engelhardti	Non-plantigrades (Dinosauromorpha + Scleromochlus)		930	6	late Norian-Rhaetian	217.75	201.3	209.525
Riojasaurus	incertus	Non-plantigrades (Dinosauromorpha + Scleromochlus)		608	6	late Norian-Rhaetian	217.75	201.3	209.525
Coelophysis	bauri	Non-plantigrades (Dinosauromorpha + Scleromochlus)		245	6	late Norian-Rhaetian	217.75	201.3	209.525
Tawa	hallae	Non-plantigrades (Dinosauromorpha + Scleromochlus)		174	6	late Norian-Rhaetian	217.75	201.3	209.525
Zupaysaurus	rougieri	Non-plantigrades (Dinosauromorpha + Scleromochlus)		366	6	late Norian-Rhaetian	217.75	201.3	209.525
Dromomeron	romeri	Non-plantigrades (Dinosauromorpha + Scleromochlus)		127.6	6	late Norian-Rhaetian	217.75	201.3	209.525
Eucoelophysis	baldwini	Non-plantigrades (Dinosauromorpha + Scleromochlus)		210	6	late Norian-Rhaetian	217.75	201.3	209.525
Melanorosaurus	readi	Non-plantigrades (Dinosauromorpha + Scleromochlus)		620	6	late Norian-Rhaetian	217.75	201.3	209.525
Efraasia	minor	Non-plantigrades (Dinosauromorpha + Scleromochlus)		627	6	late Norian	217.75	208.5	213.125
Plateosaurus	longiceps	Non-plantigrades (Dinosauromorpha + Scleromochlus)		610	6	late Norian	217.75	208.5	213.125
Plateosaurus	quenstedti	Non-plantigrades (Dinosauromorpha + Scleromochlus)		700	6	late Norian	217.75	208.5	213.125
Ruehleia	bedheimensis	Non-plantigrades (Dinosauromorpha + Scleromochlus)		800	6	late Norian	217.75	208.5	213.125
Liliensternus	liliensterni	Non-plantigrades (Dinosauromorpha + Scleromochlus)		424	6	late Norian	217.75	208.5	213.125
Procompsognathus	triassicus	Non-plantigrades (Dinosauromorpha + Scleromochlus)		93.1	6	late Norian	217.75	208.5	213.125
Guaibasaurus	candelariensis	Non-plantigrades (Dinosauromorpha + Scleromochlus)		214	6	late Norian	217.75	208.5	213.125
Sacisaurus	agudoensis	Non-plantigrades (Dinosauromorpha + Scleromochlus)		103	6	late Norian	217.75	208.5	213.125
Lessemsaurus	sauropoides	Non-plantigrades (Dinosauromorpha + Scleromochlus)		780	7	late Norian	217.75	208.5	213.125
Plateosaurus	gracilis	Non-plantigrades (Dinosauromorpha + Scleromochlus)		543	7	late Norian	217.75	208.5	213.125
Chindesaurus	bryansmalli	Non-plantigrades (Dinosauromorpha + Scleromochlus)		265	6	late Carnian-Rhaetian	232	201.3	216.65
Dromomeron	gregorii	Non-plantigrades (Dinosauromorpha + Scleromochlus)		96	6	Norian	227	208.5	217.75
Diodorus	scytobrachion	Non-plantigrades (Dinosauromorpha + Scleromochlus)		93.13	45	Carnian-Norian	237	208.5	222.75
Saturnalia	tupiniquim	Non-plantigrades (Dinosauromorpha + Scleromochlus)		157	6	late Carnian-early Norian	232	217.75	224.875
Scleromochlus	taylori	Non-plantigrades (Dinosauromorpha + Scleromochlus)		32	6	late Carnian-early Norian	232	217.75	224.875
Pisanosaurus	mertii	Non-plantigrades (Dinosauromorpha + Scleromochlus)		170.3	6	late Carnian	232	227	229.5
Chromogisaurus	novasi	Non-plantigrades (Dinosauromorpha + Scleromochlus)		160	6	late Carnian	232	227	229.5
Panphagia	protos	Non-plantigrades (Dinosauromorpha + Scleromochlus)		190	6	late Carnian	232	227	229.5
Eodromaeus	murphi	Non-plantigrades (Dinosauromorpha + Scleromochlus)		160	6	late Carnian	232	227	229.5
Herrerasaurus	ischigualastensis	Non-plantigrades (Dinosauromorpha + Scleromochlus)		482	6	late Carnian	232	227	229.5
Staurikosaurus	pricei	Non-plantigrades (Dinosauromorpha + Scleromochlus)		220	6	late Carnian	232	227	229.5
Eoraptor	lunensis	Non-plantigrades (Dinosauromorpha + Scleromochlus)		154	6	late Carnian	232	227	229.5
Silesaurus	opolensis	Non-plantigrades (Dinosauromorpha + Scleromochlus)		200	6	late Carnian	232	227	229.5
Lagerpeton	chanarensis	Non-plantigrades (Dinosauromorpha + Scleromochlus)		77.8	6	Ladinian-early Carnian	242	232	237
Lewisuchus	admixtus	Non-plantigrades (Dinosauromorpha + Scleromochlus)		115	6	Ladinian-early Carnian	242	232	237
Marasuchus	lilloensis	Non-plantigrades (Dinosauromorpha + Scleromochlus)		56.3	6	Ladinian-early Carnian	242	232	237
Asilisaurus	kongwe	Non-plantigrades (Dinosauromorpha + Scleromochlus)		140	6	late Anisian	244.6	242	243.3
Sunosuchus	sp	Non- ornithodiran Archosauromorpha	Pseudosuchia	120	46	Callovian	166.1	163.5	164.8
Kayentasuchus	walkeri	Non- ornithodiran Archosauromorpha	Pseudosuchia	134	6	Sinemurian-Pliensbachian	199.3	182.7	191
Pedeticosaurus	leviseuri	Non- ornithodiran Archosauromorpha	Pseudosuchia	66	6	Sinemurian	199.3	190.8	195.05
Orthosuchus	stormbergi	Non- ornithodiran Archosauromorpha	Pseudosuchia	80	6	Hettangian-Sinemurian	201.3	190.8	196.05
Lesothosuchus	charigi	Non- ornithodiran Archosauromorpha	Pseudosuchia	70	6	Hettangian-Sinemurian	201.3	190.8	196.05
Protosuchus	haughtoni	Non- ornithodiran Archosauromorpha	Pseudosuchia	70	6	Hettangian-Sinemurian	201.3	190.8	196.05
Litargosuchus	leptorhynchus	Non- ornithodiran Archosauromorpha	Pseudosuchia	74	7	Hettangian	201.3	199.3	200.3
Protosuchus	richardsoni	Non- ornithodiran Archosauromorpha	Pseudosuchia	100	6	early Hettangian	201.3	200.3	200.8
Terrestrisuchus	gracilis	Non- ornithodiran Archosauromorpha	Pseudosuchia	96	6	Rhaetian	208.5	201.3	204.9
Neoaetosauroides	engaeus	Non- ornithodiran Archosauromorpha	Pseudosuchia	378	6	late Norian-Rhaetian	217.75	201.3	209.525
Effigia	okeeffeae	Non- ornithodiran Archosauromorpha	Pseudosuchia	163	6	late Norian-Rhaetian	217.75	201.3	209.525
Fasolasuchus	tenax	Non- ornithodiran Archosauromorpha	Pseudosuchia	700	6	late Norian-Rhaetian	217.75	201.3	209.525
Pseudhesperosuchus	jachaleri	Non- ornithodiran Archosauromorpha	Pseudosuchia	158	6	late Norian-Rhaetian	217.75	201.3	209.525
Riojasuchus	tenuisceps	Non- ornithodiran Archosauromorpha	Pseudosuchia	163	6	late Norian-Rhaetian	217.75	201.3	209.525
Dolabrosaurus	aquatilis	Non- ornithodiran Archosauromorpha		14	6	late Norian-Rhaetian	217.75	201.3	209.525
Desmatosuchus	smalli	Non- ornithodiran Archosauromorpha	Pseudosuchia	490	6	? late Norian	217.75	208.5	213.125
Aetosaurus	ferratus	Non- ornithodiran Archosauromorpha	Pseudosuchia	83	6	late Norian	217.75	208.5	213.125
Saltoposuchus	connectens	Non- ornithodiran Archosauromorpha	Pseudosuchia	105	6	late Norian	217.75	208.5	213.125
Drepanosaurus	unguicaudatus	Non- ornithodiran Archosauromorpha		22	6	late Norian	217.75	208.5	213.125
Teyumbaita	sulcognathus	Non- ornithodiran Archosauromorpha		192.9	6	late Norian	217.75	208.5	213.125
Vallesaurus	cenensis	Non- ornithodiran Archosauromorpha		10	6	late Norian (late Alaunian)	217.75	208.5	213.125
Vallesaurus	zorzinensis	Non- ornithodiran Archosauromorpha		23	6	late Norian (late Alaunian)	217.75	208.5	213.125
Megalancosaurus	endennae	Non- ornithodiran Archosauromorpha		15	6	late Norian (late Alaunian)	217.75	208.5	213.125
Megalancosaurus	preonensis	Non- ornithodiran Archosauromorpha		23.5	6	late Norian (late Alaunian)	217.75	208.5	213.125
Langobardisaurus	pandolfi	Non- ornithodiran Archosauromorpha		58	6	late Norian (late Alaunian-Sevatian)	217.75	208.5	213.125
Langobardisaurus	tonelloi	Non- ornithodiran Archosauromorpha		47	6	late Norian (late Alaunian-Sevatian)	217.75	208.5	213.125
Revueltosaurus	callanderi	Non- ornithodiran Archosauromorpha	Pseudosuchia	93	6	early Norian-Rhaetian	227	201.3	214.15
Postosuchus	kirkpatricki	Non- ornithodiran Archosauromorpha	Pseudosuchia	392	6	early Norian-Rhaetian	227	201.3	214.15
Typothorax	coccinarum	Non- ornithodiran Archosauromorpha	Pseudosuchia	292	6	Norian-Rhaetian	227	201.3	214.15
Coahomasuchus	kahleorum	Non- ornithodiran Archosauromorpha	Pseudosuchia	109	6	Norian	227	208.5	217.75
Hesperosuchus	agilis	Non- ornithodiran Archosauromorpha	Pseudosuchia	140	6	Norian	227	208.5	217.75
Poposaurus	gracilis	Non- ornithodiran Archosauromorpha	Pseudosuchia	465	6	late Carnian-Norian	232	208.5	220.25
Dromicosuchus	grallator	Non- ornithodiran Archosauromorpha	Pseudosuchia	144	6	early Norian	227	217.75	222.375
Stagonolepis	wellesi	Non- ornithodiran Archosauromorpha	Pseudosuchia	329	7	early Norian	227	217.75	222.375
Longosuchus	meadei	Non- ornithodiran Archosauromorpha	Pseudosuchia	337	7	early Norian	227	217.75	222.375
Shuvosaurus	inexpectatus	Non- ornithodiran Archosauromorpha	Pseudosuchia	255	7	early Norian	227	217.75	222.375
Hypuronector	limnaios	Non- ornithodiran Archosauromorpha		11	6	?early Norian	227	217.75	222.375
Aetosauroides	scagliai	Non- ornithodiran Archosauromorpha	Pseudosuchia	162	6	late Carnian-early Norian	232	217.75	224.875
Stagonolepis	robertsoni	Non- ornithodiran Archosauromorpha	Pseudosuchia	315	6	late Carnian-early Norian	232	217.75	224.875
Ornithosuchus	longidens	Non- ornithodiran Archosauromorpha	Pseudosuchia	350	6	late Carnian-early Norian	232	217.75	224.875
Hyperodapedon	gordoni	Non- ornithodiran Archosauromorpha		125	6	late Carnian-early Norian	232	217.75	224.875
Scaphonyx	fischeri	Non- ornithodiran Archosauromorpha		160	6	late Carnian-early Norian	235	216	225.5
Chanaresuchus	ischigualastensis	Non- ornithodiran Archosauromorpha		114	47	late Carnian	232	227	229.5
Hyperodapedon	sanjuanensis	Non- ornithodiran Archosauromorpha		279	Based on PVSJ679	late Carnian	232	227	229.5
Saurosuchus	galilei	Non- ornithodiran Archosauromorpha	Pseudosuchia	650	6	late Carnian	232	227	229.5
Sillosuchus	longicervix	Non- ornithodiran Archosauromorpha	Pseudosuchia	553	6	late Carnian	232	227	229.5
Hyperodapedon	tikiensis	Non- ornithodiran Archosauromorpha		185	48	Carnian	237	227	232
Archeopelta	arborensis	Non- ornithodiran Archosauromorpha		170	6	Ladinian-early Carnian	242	232	237
Chanaresuchus	bonapartei	Non- ornithodiran Archosauromorpha		150	6	Ladinian-early Carnian	242	232	237
Tropidosuchus	romeri	Non- ornithodiran Archosauromorpha		91	6	Ladinian-early Carnian	242	232	237
Gracilisuchus	stipanicicorum	Non- ornithodiran Archosauromorpha	Pseudosuchia	81	6	Ladinian-early Carnian	242	232	237
Decuriasuchus	quartacolonia	Non- ornithodiran Archosauromorpha	Pseudosuchia	237	6	Ladinian-early Carnian	242	232	237
Prestosuchus	chiniquensis	Non- ornithodiran Archosauromorpha	Pseudosuchia	450	6	Ladinian-early Carnian	242	232	237
Hyperodapedon	genovefae	Non- ornithodiran Archosauromorpha		90	6	Ladinian-early Carnian	242	232	237
Batrachotomus	kupferzellensis	Non- ornithodiran Archosauromorpha	Pseudosuchia	682	6	late Ladinian (Longobardian)	239.5	237	238.25
Dorosuchus	neoetus	Non- ornithodiran Archosauromorpha		98.3	49	Middle Triassic	247.2	237	242.1
Turfanosuchus	dabanensis	Non- ornithodiran Archosauromorpha	Pseudosuchia	140	6	Middle Triassic (Anisian-Ladinian)	247.2	237	242.1
Macrocnemus	bassanii	Non- ornithodiran Archosauromorpha		70.4	6	Middle Triassic (Anisian-Ladinian)	247.2	237	242.1
Erythrosuchus	africanus	Non- ornithodiran Archosauromorpha		450	6	Anisian	247.2	242	244.6
Euparkeria	capensis	Non- ornithodiran Archosauromorpha		61.1	6	Anisian	247.2	242	244.6
Ticinosuchus	ferox	Non- ornithodiran Archosauromorpha	Pseudosuchia	235	6	Anisian	247.2	242	244.6
Yarasuchus	deccanensis	Non- ornithodiran Archosauromorpha	Pseudosuchia	142	6	Anisian	247.2	242	244.6
Lotosaurus	adentus	Non- ornithodiran Archosauromorpha	Pseudosuchia	266	7	Anisian	247.2	242	244.6
Howesia	browni	Non- ornithodiran Archosauromorpha		50	6	Anisian	247.2	242	244.6
Mesosuchus	browni	Non- ornithodiran Archosauromorpha		51	6	Anisian	247.2	242	244.6
Rhynchosaurus	articeps	Non- ornithodiran Archosauromorpha		52	6	Anisian	247.2	242	244.6
Shansisuchus	shansisuchus	Non- ornithodiran Archosauromorpha		322	6	Anisian	247.2	242	244.6
Volaticotherium	antiquus	Therapsida		30.7	50	Callovian	166.1	163.5	164.8
Megaconus	mammaliaformis	Therapsida		39	51	Callovian	166.1	163.5	164.8
PIN4774/1 morganucodontid		Therapsida		10.5	6	upper Bathonian	167.2	166.1	166.65
Polistodon	chuannanensis	Therapsida		141.839	6	Bajocian-Callovian	170.3	163.5	166.9
Bocatherium	mexicanum	Therapsida		37.2907	6	Pliensbachian-Toarcian	190.8	174.1	182.45
Erythrotherium	parringtoni	Therapsida		7.92	6	Early Jurassic	201.3	174.1	187.7
Tritylodontoides	maximus	Therapsida		188.62	6	Early Jurassic (Hettangian-Toarcian)	201.3	174.1	187.7
Kayentatherium	wellesi	Therapsida		142	6	Hettangian-Pliensbachian	201.3	182.7	192
Oligokyphus	major	Therapsida		42.6	6	Hettangian-Pliensbachian	201.3	182.7	192
Hadrocodium	wui	Therapsida		13.0366	6	Sinemurian	199.3	190.8	195.05
Eozostrodon	parvus	Therapsida		16.75	6	Hettangian-Sinemurian	201.3	190.8	196.05
Megazostrodon	sp.	Therapsida		15.2478	6	Hettangian-Sinemurian	201.3	190.8	196.05
Pachygenelus	monus	Therapsida		20.914	6	Hettangian-Sinemurian	201.3	190.8	196.05
Sinoconodon	sp.	Therapsida		29.2	6	Rhaetian	208.5	201.3	204.9
Brasilitherium	riograndensis	Therapsida		18.841	6	Norian	227	208.5	217.75
Brasilodon	quadrangularis	Therapsida		22.296	6	Norian	227	208.5	217.75
Irajatherium	hernandezi	Therapsida		18	6	Norian	227	208.5	217.75
Minicynodon	maieri	Therapsida		20.223	6	Norian	227	208.5	217.75
Jachaleria	candelariensis	Therapsida		272	6	early Norian	227	217.75	222.375
Jachaleria	colorata	Therapsida		300.078	6	early Norian	227	217.75	222.375
Riograndia	guaibensis	Therapsida		28.515	6	early Norian	227	217.75	222.375
Placerias	hesternus	Therapsida		311	6	late Carnian-early Norian	232	217.75	224.875
Exaeretodon	riograndensis	Therapsida		175.698	6	late Carnian-early Norian	232	217.75	224.875
Gomphodontosuchus	brasiliensis	Therapsida		122	6	late Carnian-early Norian	232	217.75	224.875
Ischigualastia	jenseni	Therapsida		300	6	late Carnian	232	227	229.5
Ischigualastia	sp.	Therapsida		363	6	late Carnian	232	227	229.5
Lisowice Dicynodontia indet.		Therapsida		560	6	late Carnian	232	227	229.5
Boreogomphodon	jeffersoni	Therapsida		14.5	6	late Carnian	232	227	229.5
Chiniquodon	sanjuanensis	Therapsida		59.6791	6	late Carnian	232	227	229.5
Ecteninion	lunensis	Therapsida		72.3244	6	late Carnian	232	227	229.5
Exaeretodon	argentinus	Therapsida		177.08	6	late Carnian	232	227	229.5
Trucidocynodon	riograndensis	Therapsida		127.1	6	late Carnian	232	227	229.5
Placerias	nmachouensis	Therapsida		289.022	6	middle Carnian	233.667	230.333	232
Exaeretodon	statisticae	Therapsida		134.929	6	Carnian	237	227	232
Dinodontosaurus	pedroanum	Therapsida		238	6	Ladinian-Carnian	242	227	234.5
Stahleckeria	potens	Therapsida		450	6	Ladinian-Carnian	242	227	234.5
Belesodon	magnificus	Therapsida		160	6	Ladinian-Carnian	242	227	234.5
Chiniquodon	theotonicus	Therapsida		94.16	6	Ladinian-Carnian	242	227	234.5
Menadon	besairiei	Therapsida		113.508	6	Ladinian-Carnian	242	227	234.5
Probelesodon	lewisi	Therapsida		80	6	Ladinian-Carnian	242	227	234.5
Protheriodon	estudianti	Therapsida		33.6975	6	Ladinian-Carnian	242	227	234.5
Protuberum	cabralensis	Therapsida		142.53	6	Ladinian-Carnian	242	227	234.5
Traversodon	stahleckeri	Therapsida		122	6	Ladinian-Carnian	242	227	234.5
Luangwa	sudamericana	Therapsida		98.306	6	Anisian-Carnian	247.2	227	237.1
Chiniquodon	cf. C. theotonicus	Therapsida		140	6	Ladinian	242	237	239.5
Massetognathus	pascuali	Therapsida		69.975	6	early Ladinian	242	239.5	240.75
Probainognathus	jenseni	Therapsida		58	6	Anisian-Ladinian	247.2	237	242.1
Herpetogale	marsupialis	Therapsida		65.6908	6	Anisian-Ladinian	247.2	237	242.1
Angonisaurus	cruickshanki	Therapsida		211.63	6	late Anisian	244.6	242	243.3
Dolichuranus	primaevus	Therapsida		260	6	Anisian	247.2	242	244.6
Kannemeyeria	argentinensis	Therapsida		163.122	6	Anisian	247.2	242	244.6
Kannemeyeria	erithrea	Therapsida		297.66	6	Anisian	247.2	242	244.6
Kannemeyeria	lophorhinus	Therapsida		286.949	6	Anisian	247.2	242	244.6
Kannemeyeria	simocephalus	Therapsida		360	6	Anisian	247.2	242	244.6
Kombuisia	frerensis	Therapsida		57.3988	6	Anisian	247.2	242	244.6
Parakannemeyeria	chengi	Therapsida		235.815	6	Anisian	247.2	242	244.6
Parakannemeyeria	dolichodephala	Therapsida		378	6	Anisian	247.2	242	244.6
Parakannemeyeria	ningwuensis	Therapsida		306.297	6	Anisian	247.2	242	244.6
Parakannemeyeria	shenmuensis	Therapsida		245.489	6	Anisian	247.2	242	244.6
Parakannemeyeria	sp.	Therapsida		345	6	Anisian	247.2	242	244.6
Parakannemeyeria	youngi	Therapsida		380	6	Anisian	247.2	242	244.6
Rabidosaurus	cristatus	Therapsida		283.494	6	Anisian	247.2	242	244.6
Rechnisaurus	cristarhynchus	Therapsida		30.588	6	Anisian	247.2	242	244.6
Rhadiodromus	klimovi	Therapsida		320.117	6	Anisian	247.2	242	244.6
Rhadiodromus	mariae	Therapsida		267.67	6	Anisian	247.2	242	244.6
Rhinodicynodon	gracile	Therapsida		120	6	Anisian	247.2	242	244.6
Sangusaurus	parringtonii	Therapsida		349.83	6	Anisian	247.2	242	244.6
Shansiodon	shaanbeiensis	Therapsida		117.654	6	Anisian	247.2	242	244.6
Shansiodon	wangi	Therapsida		108	6	Anisian	247.2	242	244.6
Shansiodon	wuhsiangensis	Therapsida		117.654	6	Anisian	247.2	242	244.6
Sinokannemeyeria	pearsoni	Therapsida		256	6	Anisian	247.2	242	244.6
Sinokannemeyeria	sp.(V.986)	Therapsida		348	6	Anisian	247.2	242	244.6
Sinokannemeyeria	yingchaoensis	Therapsida		315.28	6	Anisian	247.2	242	244.6
Tetragonias	njalilus	Therapsida		242	6	Anisian	247.2	242	244.6
Uralokannemeyeria	vjuschkovi	Therapsida		305.606	6	Anisian	247.2	242	244.6
Vinceria	andina	Therapsida		86.7663	6	Anisian	247.2	242	244.6
Wadiasaurus	indicus	Therapsida		306	6	Anisian	247.2	242	244.6
Zambiasaurus	submersus	Therapsida		185	6	Anisian	247.2	242	244.6
Aleodon	brachyrhamphus	Therapsida		112.126	6	Anisian	247.2	242	244.6
Andescynodon	mendozensis	Therapsida		43	6	Anisian	247.2	242	244.6
Bolotridon	frerensis	Therapsida		63.5	6	Anisian	247.2	242	244.6
Diademodon	rhodesiensis	Therapsida		152.895	6	Anisian	247.2	242	244.6
Luangwa	drysdali	Therapsida		101.5	6	Anisian	247.2	242	244.6
Luangwa	sp.	Therapsida		108	6	Anisian	247.2	242	244.6
Neotrirachodon	expectatus	Therapsida		87.25	6	Anisian	247.2	242	244.6
Pascualgnathus	polanskii	Therapsida		87.25	6	Anisian	247.2	242	244.6
Scalenodon?	sp.	Therapsida		82.8	6	Anisian	247.2	242	244.6
Sinognathus	gracilis	Therapsida		87.941	6	Anisian	247.2	242	244.6
Trirachodon	berryi	Therapsida		35.2	6	Anisian	247.2	242	244.6
Aelurosuchus	browni	Therapsida		67.902	6	Olenakian-Anisian	251.2	242	246.6
Cistecynodon	parvus	Therapsida		42.335	6	Olenakian-Anisian	251.2	242	246.6
Cynognathus	crateronotus	Therapsida		105.216	6	Olenakian-Anisian	251.2	242	246.6
Cynognathus	sp.	Therapsida		277.98	6	Olenakian-Anisian	251.2	242	246.6
Diademodon	grossarthi	Therapsida		119.036	6	Olenakian-Anisian	251.2	242	246.6
Diademodon	mastacus	Therapsida		92.087	6	Olenakian-Anisian	251.2	242	246.6
Diademodon	sp.	Therapsida		118.63	6	Olenakian-Anisian	251.2	242	246.6
Diademodon	tetragonus	Therapsida		165.333	6	Olenakian-Anisian	251.2	242	246.6
Lumkuia	fuzzi	Therapsida		52.7	6	Olenakian-Anisian	251.2	242	246.6
Bauria	cynops	Therapsida		95.542	6	Olenakian-Anisian	251.2	242	246.6
Pedaeosaurus	parvus	Therapsida		23.678	6	Induan-Anisian	252.17	242	247.085
